# Supplementary material
Source: PubMed Central journal article supplement (PMC2741589)
Supplement: mmc1.pdf [file mmc1.pdf]

Biophysical Journal, Volume 97

**Supporting Material**

**The Structure of Neuroglobin at High Xe and Kr Pressure Reveals Partial Conservation of Globin Internal Cavities**

Tommaso Moschetti, Uwe Mueller, Jörg Schulze, Maurizio Brunori, and Beatrice Vallone

**Supplementary Table 1: Data collection and refinement statistics\***

|                                            | metNgb•Xe             | metNgb•Kr            | NgbCO•Xe               |
|--------------------------------------------|-----------------------|----------------------|------------------------|
| <b>Data collection</b>                     |                       |                      |                        |
| Space group                                | R 32 <sup>†</sup>     | R 32 <sup>†</sup>    | R 32 <sup>†</sup>      |
| a, b, c (Å)                                | 88.83, 88.83, 110.93  | 88.80, 88.80, 113.50 | 88.68, 88.68, 109.83   |
| $\alpha, \beta, \gamma$ (°)                | 90, 90, 120           | 90, 90, 120          | 90, 90, 120            |
| Resolution Range (Å)                       | 44.99-1.80(1.90-1.80) | 19.5-1.86 (2.1-1.86) | 31.47-2.25 (2.37-2.25) |
| Completeness (%)                           | 100 (100)             | 99.7 (100)           | 97.5 (84.7)            |
| Redundancy (%)                             | 10.8(10.8)            | 6.17 (6.22)          | 9.3 (7.6)              |
| R <sub>meas</sub>                          | 0.06 (0.38)           | 0.05 (0.38)          | 0.059 (0.22)           |
| $\langle I / \sigma I \rangle$             | 31.3 (5.6)            | 22.84 (5.03)         | 29.6 (8.7)             |
| <b>Refinement</b>                          |                       |                      |                        |
| Resolution (Å)                             | 1.80                  | 1.86                 | 2.26                   |
| No. of reflections                         | 15036                 | 13599                | 7509                   |
| R <sub>cryst</sub> / R <sub>free</sub> (%) | 18.6/ 21.0            | 17.2/20.8            | 19.2/25.4              |
| No. of protein atoms                       | 1297                  | 1285                 | 1257                   |
| No. of ligand atoms<br>(Xe or Kr)          | 6                     | 2                    | 5                      |
| No. of ion atoms                           | 5                     | 5                    | 5                      |
| No. of water oxygens                       | 83                    | 75                   | 47                     |
| <b>B-factors (Å<sup>2</sup>)</b>           |                       |                      |                        |
| Protein                                    | 21.6                  | 28.3                 | 35.8                   |
| Ligand                                     | 16.8                  | 42.1                 | 37.2                   |
| Ion                                        | 22.7                  | 35.3                 | 28.8                   |
| Water                                      | 32.3                  | 41.0                 | 44.1                   |
| overall                                    | 22.3                  | 29.0                 | 36.0                   |
| <b>R.m.s deviations</b>                    |                       |                      |                        |
| Bond lengths (Å)                           | 0.014                 | 0.016                | 0.013                  |
| Bond angles (°)                            | 1.332                 | 1.452                | 1.814                  |

\*Highest resolution shell is shown in parenthesis.

<sup>†</sup> Based on the Laue classes; in this case, it was the hexagonal setting H 3 2

### Tab.1: Data collection and refinement statistics

Data collection and refinement statistics for metNgb-Xe, metNgb-Kr and NgbCO-Xe.

PDB codes are, respectively: 3GK9, 3GKT, 3GLN.
